# Supplementary material
Source: Springer Nature journal article supplement (http://www.springermedizin.de/resource/supplementary/12958_2009_545_MOESM2_ESM.pdf/9568272)

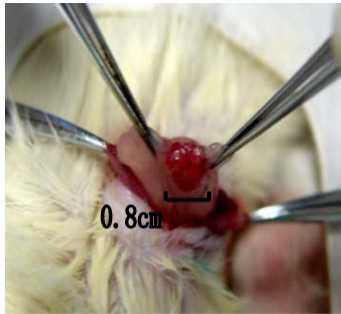

A

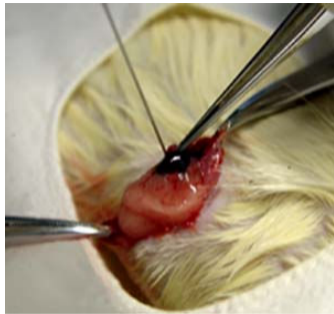

B

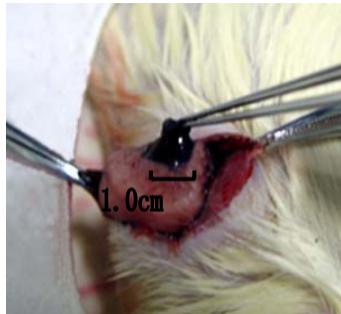

C

Supplement: MOESM2 [file 9568272]
